# Supplementary material
Source: PubMed Central journal article supplement (PMC3645562)
Supplement: 1305286110_pnas.201305286SI.pdf [file 1305286110_pnas.201305286SI.pdf]

# Supporting Information

Gallop et al. 10.1073/pnas.1305286110

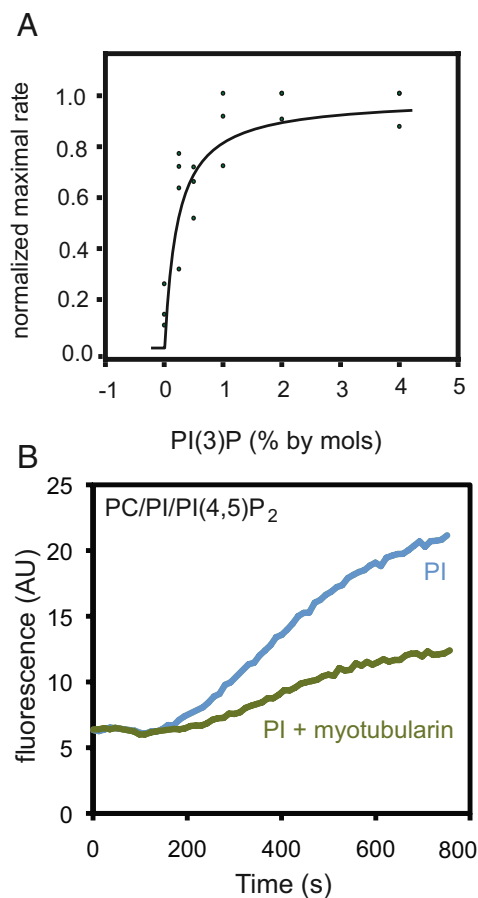

**Fig. S1.** (A) Dose–response of actin polymerization by pyrene actin assay from liposomes with phosphatidylinositol 3-phosphate [PI(3)P] and PI(4,5)P<sub>2</sub>. (B) Pyrene actin assay on addition of 48% pheochromocytoma (PC), 47% PI, and 5% PI(4,5)P<sub>2</sub> liposomes in extracts that were incubated with 3-phosphatase myotubularin showing a role for 3-kinase activity.
